# Supplementary material for: Significance of atomic-scale defects in flexible surfaces on local solvent and ion behaviour
Source: Royal Society of Chemistry journal article supplement (doi:10.1039/d1fd00082a), 2022-01-01
Supplement: d1fd00082a1.pdf [file d1fd00082a1.pdf]

## 5 Supplementary Material

### 5.1 Defect Setup

Defects were set up by removing the layers from the underlying (111) Au surface as discussed in the main body of the paper. The characteristic Au-Au distance of  $2.87\text{\AA}$  has been maintained in all cases. Similarly, a  $30^\circ$  angle with respect to the normal to the plane for each SAM chain has been maintained. As shown in Fig.12 for the *flat surface* case, S-atoms on the 16-MHDA chains will typically sit at specific surface points in-between 3 Au-atoms, separated by a characteristic distance of  $4.98\text{\AA}$ . This characteristic S positioning has been maintained for all the defects we generated. Setting up the configuration for *Vacancy type B* has required a minor shift of  $1.34\text{\AA}$  of the S-atoms as indicated in the figure. This was necessary as otherwise the depth of the defect in combination with the orientation of the chains causes overlap between chains in the starting configuration. In Fig.12 we have highlighted the original placement in blue as well as the movement of the S-atoms in red.

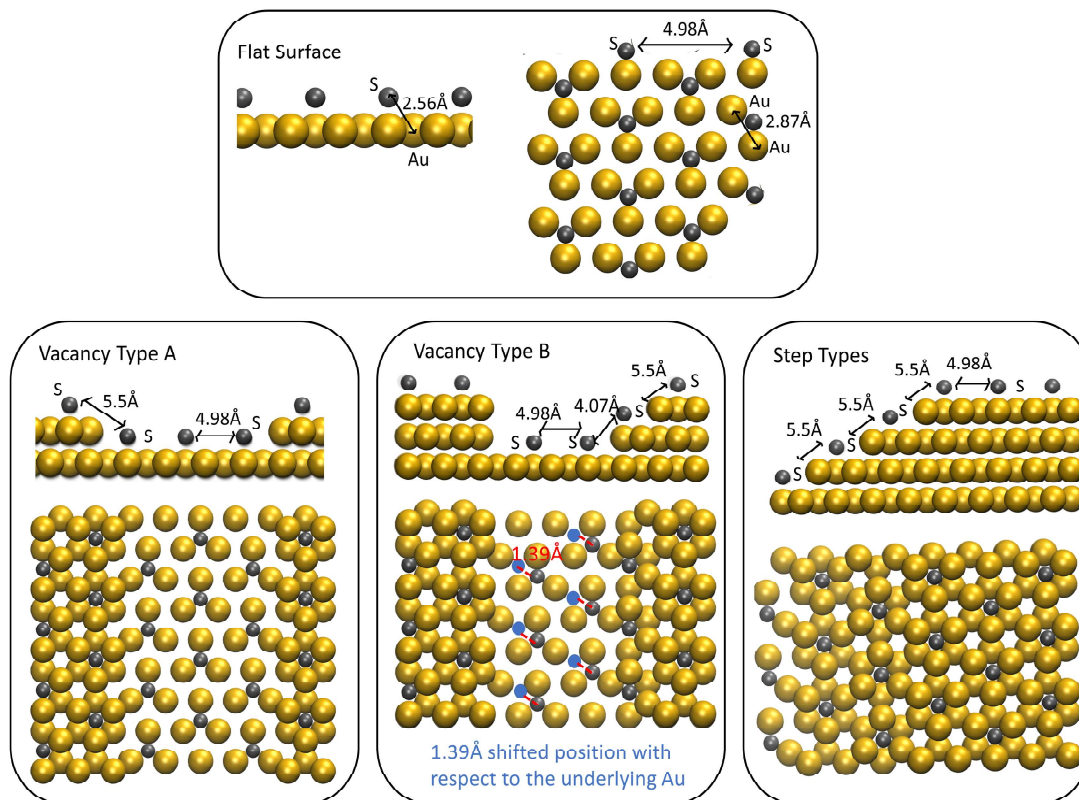

**Fig. 12** Schematic of defect configuration setup. Au-atoms are depicted in yellow, while S-atoms have been shown in grey for clarity. Two different aspects have been provided for each surface topology - an xz-plane (left) and an xy-plane (right) views.

### 5.2 Full List of Forcefield Parameters

Tables 1 and 2 in this section give the non-bonded and bonded parameters used to set up the forcefield interactions. A reference to the atom labels can be found in Fig.13. The forcefield setup follows that of Raiteri et al.<sup>29</sup>, where all calcium and carbonate intermolecular terms are tapered to 0 over the range of  $6-9\text{\AA}$ .

16-MHDA was parametrised using the standard *antechamber* procedure which generates atomic charges for the AMBER forcefield, while charges for  $\text{CaCO}_3$  and  $\text{H}_2\text{O}$  are those of the Raiteri et al.<sup>29</sup> forcefield. Whenever the Lennard-Jones potential has been used, we use the standard 12/6 format, given as:

$$E = 4\epsilon \left[ \left( \frac{\sigma}{r} \right)^{12} - \left( \frac{\sigma}{r} \right)^6 \right] \quad (1)$$

Table 2 Non-bonded interactions.

| Lennard-Jones                  | $\epsilon$<br>[eV] | $\sigma$<br>[Å] |                            |
|--------------------------------|--------------------|-----------------|----------------------------|
| C <sub>3</sub> -C <sub>3</sub> | 0.00474820         | 3.39961         |                            |
| C <sub>3</sub> -C              | 0.00420798         | 3.39974         |                            |
| C <sub>3</sub> -O <sub>H</sub> | 0.00658129         | 3.23316         |                            |
| C <sub>3</sub> -O              | 0.00657459         | 3.17990         |                            |
| C <sub>3</sub> -H <sub>C</sub> | 0.00180006         | 3.02437         |                            |
| C-C                            | 0.00373303         | 3.39958         |                            |
| C-O <sub>H</sub>               | 0.00583914         | 3.23297         |                            |
| C-O                            | 0.00583048         | 3.17984         |                            |
| C-H <sub>C</sub>               | 0.00159251         | 3.02491         |                            |
| O <sub>H</sub> -O <sub>H</sub> | 0.00912738         | 3.06654         |                            |
| O <sub>H</sub> -O              | 0.00912302         | 3.01315         |                            |
| O <sub>H</sub> -H <sub>C</sub> | 0.00249707         | 2.85771         |                            |
| O-O                            | 0.00911094         | 2.95997         |                            |
| O-H <sub>C</sub>               | 0.00248998         | 2.80488         |                            |
| H <sub>C</sub> -H <sub>C</sub> | 0.00067729         | 2.65083         |                            |
| O <sub>W</sub> -O <sub>W</sub> | 0.00674            | 3.16549         |                            |
| C <sub>3</sub> -O <sub>W</sub> | 0.00565711         | 3.28255         |                            |
| C-O <sub>W</sub>               | 0.00501604         | 3.28253         |                            |
| O <sub>H</sub> -O <sub>W</sub> | 0.00784338         | 3.11602         |                            |
| O-O <sub>W</sub>               | 0.00783631         | 3.06273         |                            |
| H <sub>C</sub> -O <sub>W</sub> | 0.00213658         | 2.90816         |                            |
| C <sub>3</sub> -Au             | 0.00283275         | 3.1673          |                            |
| C-Au                           | 0.00251174         | 3.1673          |                            |
| O <sub>H</sub> -Au             | 0.0039275          | 3.00077         |                            |
| O-Au                           | 0.00392396         | 2.94749         |                            |
| H <sub>C</sub> -Au             | 0.00106987         | 2.79291         |                            |
| Ca-O <sub>W</sub>              | 0.00095            | 3.35            |                            |
| C <sub>3</sub> -C <sub>C</sub> | 0.00420798         | 3.39974         |                            |
| C-C <sub>C</sub>               | 0.00373303         | 3.39958         |                            |
| O <sub>H</sub> -C <sub>C</sub> | 0.00583914         | 3.23297         |                            |
| O-C <sub>C</sub>               | 0.00583048         | 3.17984         |                            |
| H <sub>C</sub> -C <sub>C</sub> | 0.00159251         | 3.02491         |                            |
| C <sub>3</sub> -O <sub>C</sub> | 0.00967158         | 3.07231         |                            |
| C-O <sub>C</sub>               | 0.00857559         | 3.07229         |                            |
| O <sub>H</sub> -O <sub>C</sub> | 0.0134093          | 2.90577         |                            |
| O-O <sub>C</sub>               | 0.0133972          | 2.85249         |                            |
| H <sub>C</sub> -O <sub>C</sub> | 0.00365275         | 2.69792         |                            |
| Buckingham                     | $A$<br>[eV]        | $\rho$<br>[Å]   | $C$<br>[eVÅ <sup>6</sup> ] |
| Ca-O <sub>C</sub>              | 3161.63            | 0.27151         | 0.0                        |
| Ca-C <sub>C</sub>              | 120000000          | 0.12            | 0.0                        |
| O <sub>C</sub> -O <sub>C</sub> | 63840.20           | 0.19891         | 27.899                     |
| O <sub>C</sub> -O <sub>W</sub> | 12534.46           | 0.2020          | 12.090                     |
| O <sub>C</sub> -H <sub>W</sub> | 396.30             | 0.2170          | 0.0                        |
| Ca-O                           | 1820.0             | 0.27151         | 0.0                        |
| Ca-O <sub>H</sub>              | 1999.8             | 0.27151         | 0.0                        |
| Ca-C                           | 120000000          | 0.12            | 0.0                        |
| Ca-C <sub>3</sub>              | 120000000          | 0.12            | 0.0                        |

Table 3 Bonded interactions.

| Harmonic                                                       | $k_2$<br>[eV Å <sup>-2</sup> ]        | $r_0$<br>[Å]                   |                   |
|----------------------------------------------------------------|---------------------------------------|--------------------------------|-------------------|
| C <sub>3</sub> -C <sub>3</sub>                                 | 13.042                                | 1.5375                         |                   |
| C <sub>3</sub> -C                                              | 13.567                                | 1.5250                         |                   |
| C <sub>3</sub> -H <sub>C</sub>                                 | 14.330                                | 1.0969                         |                   |
| C-O <sub>H</sub>                                               | 17.342                                | 1.3513                         |                   |
| C-O                                                            | 27.642                                | 1.2183                         |                   |
| O <sub>H</sub> -H <sub>O</sub>                                 | 16.098                                | 0.9730                         |                   |
| C <sub>3</sub> -S                                              | 13.042                                | 1.8450                         |                   |
| O <sub>W</sub> -H <sub>W</sub>                                 | 22.965                                | 1.012                          |                   |
| C <sub>C</sub> -O <sub>C</sub>                                 | 17.950                                | 1.313                          |                   |
| Angle-bending                                                  | $k_\theta$<br>[eV rad <sup>-2</sup> ] | $\theta_0$<br>[deg]            |                   |
| C <sub>3</sub> -C <sub>3</sub> -C <sub>3</sub>                 | 2.726                                 | 111.51                         |                   |
| C <sub>3</sub> -C <sub>3</sub> -H <sub>C</sub>                 | 2.006                                 | 109.80                         |                   |
| C <sub>3</sub> -C <sub>3</sub> -C                              | 2.743                                 | 111.04                         |                   |
| C <sub>3</sub> -C-O <sub>H</sub>                               | 2.964                                 | 112.73                         |                   |
| C <sub>3</sub> -C-O                                            | 2.921                                 | 123.2                          |                   |
| C-C <sub>3</sub> -H <sub>C</sub>                               | 2.032                                 | 108.77                         |                   |
| C-O <sub>H</sub> -H <sub>O</sub>                               | 2.162                                 | 106.55                         |                   |
| O <sub>H</sub> -C-O                                            | 3.289                                 | 122.1                          |                   |
| H <sub>C</sub> -C <sub>3</sub> -H <sub>C</sub>                 | 1.707                                 | 107.58                         |                   |
| H <sub>W</sub> -O <sub>W</sub> -H <sub>W</sub>                 | 1.645                                 | 113.24                         |                   |
| O <sub>C</sub> -C <sub>C</sub> -O <sub>C</sub>                 | 6.000                                 | 120.0                          |                   |
| Dihedrals                                                      | $k_\phi$<br>[eV]                      | $n$                            | $\delta$<br>[deg] |
| C <sub>3</sub> -C <sub>3</sub> -C <sub>3</sub> -C <sub>3</sub> | 0.0078                                | 3                              | 0                 |
| C <sub>3</sub> -C <sub>3</sub> -C <sub>3</sub> -C <sub>3</sub> | 0.0087                                | 1                              | 180               |
| C <sub>3</sub> -C <sub>3</sub> -C <sub>3</sub> -C <sub>3</sub> | 0.0108                                | 2                              | 180               |
| C <sub>3</sub> -C <sub>3</sub> -C <sub>3</sub> -H <sub>C</sub> | 0.0069                                | 3                              | 0                 |
| C-C <sub>3</sub> -C <sub>3</sub> -H <sub>C</sub>               | 0.0067                                | 3                              | 0                 |
| C <sub>3</sub> -C-O <sub>H</sub> -H <sub>O</sub>               | 0.0997                                | 2                              | 180               |
| O-C-C <sub>3</sub> -H <sub>C</sub>                             | 0.0347                                | 1                              | 0                 |
| O-C-C <sub>3</sub> -H <sub>C</sub>                             | 0.0035                                | 3                              | 180               |
| O-C-O <sub>H</sub> -H <sub>O</sub>                             | 0.0824                                | 1                              | 0                 |
| H <sub>C</sub> -C <sub>3</sub> -C <sub>3</sub> -H <sub>C</sub> | 0.0069                                | 3                              | 0                 |
| Out of plane                                                   | $k_2$<br>[eV Å <sup>-2</sup> ]        | $k_4$<br>[eV Å <sup>-4</sup> ] |                   |
| C <sub>C</sub> -O <sub>C</sub> -O <sub>C</sub> -O <sub>C</sub> | 20.796                                | 360                            |                   |

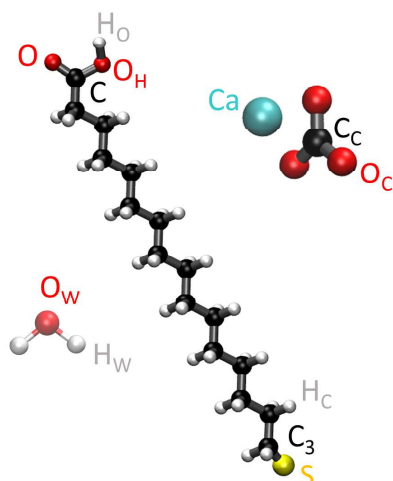

**Fig. 13** Structure of all system components, where atom labels have been introduced to ease reading of the forcefield tables in this section.

### 5.3 Interquartile Range Analysis

Interquartile range (IQR) analysis was performed when calculating the mean cluster diffusion coefficients for each case. This procedure allows us to report a representative cluster diffusion by removing any outliers. In practice, outliers correspond to ions which have detached from the cluster and have much larger diffusion coefficient for the duration of the simulation. The IQR is identified using the following procedure:

1. Identify the median in the data set and create two subgroups of data points containing the lower half values and the upper half values

2. Find the median of each subgroup, which are referred to as Q1, the 25<sup>th</sup> percentile, and Q3, the 75<sup>th</sup> percentile.

3. The IQR is the difference of Q3–Q1

Outliers were flagged where they fall outside the boundary of  $Q1 - 1.5 \times IQR$  and  $Q3 + 1.5 \times IQR$ .

The table below reports all diffusion coefficients, where those highlighted in red have been flagged up as outliers following the aforementioned procedure. For reference, all IQR analysis plots have also been provided.

**Table 4** Diffusion data on individual ions in each run, where the outliers discarded from the calculation of the ion cluster diffusion have been highlighted in red. Data has been provided in units of  $10^{-11} \text{ m}^2 \text{ s}^{-1}$

| flat surface |        |        | vacancy type A |       |       | vacancy type B |       |       | step type A |       |       | step type B |       |       |
|--------------|--------|--------|----------------|-------|-------|----------------|-------|-------|-------------|-------|-------|-------------|-------|-------|
| set 1        | set 2  | set 3  | set 1          | set 2 | set 3 | set 1          | set 2 | set 3 | set 1       | set 2 | set 3 | set 1       | set 2 | set 3 |
| 0.49         | 0.08   | 0.37   | 1.49           | 0.13  | 0.15  | 0.004          | 0.038 | 0.138 | 0.086       | 0.543 | 0.017 | 0.946       | 0.469 | 0.033 |
| 2.56         | 0.22   | 0.36   | 0.16           | 0.09  | 0.21  | 0.008          | 0.163 | 0.011 | 0.283       | 0.003 | 0.002 | 0.369       | 0.865 | 2.028 |
| 0.11         | 0.19   | 0.12   | 0.022          | 0.22  | 0.23  | 0.040          | 0.351 | 0.007 | 0.004       | 0.003 | 0.164 | 0.424       | 0.346 | 0.262 |
| 0.0042       | 0.19   | 0.027  | 1.00           | 0.12  | 0.21  | 0.011          | 0.146 | 0.008 | 0.441       | 0.033 | 0.010 | 1.632       | 0.661 | 0.179 |
| 0.031        | 2.27   | 0.029  | 0.11           | 0.26  | 0.27  | 0.113          | 0.045 | 0.003 | 0.002       | 0.227 | 0.310 | 0.128       | 0.024 | 0.061 |
| 0.012        | 0.086  | 0.17   | 0.011          | 0.12  | 0.069 | 0.088          | 0.143 | 0.038 | 0.544       | 0.087 | 0.091 | 0.158       | 0.075 | 0.049 |
| 0.076        | 0.19   | 0.028  | 4.45           | 0.024 | 0.031 | 0.015          | 0.014 | 0.007 | 0.020       | 0.034 | 0.252 | 0.176       | 0.052 | 0.016 |
| 0.53         | 0.45   | 0.079  | 0.14           | 0.59  | 0.049 | 0.064          | 0.008 | 0.006 | 0.248       | 0.289 | 0.010 | 2.161       | 0.061 | 0.149 |
| 6.78         | 0.027  | 0.13   | 0.69           | 0.075 | 0.087 | 0.012          | 0.005 | 0.007 | 0.041       | 1.257 | 0.005 | 1.380       | 0.188 | 0.043 |
| 0.32         | 0.089  | 3.1    | 0.14           | 14.9  | 1.55  | 0.009          | 0.281 | 0.005 | 0.003       | 0.244 | 0.043 | 0.310       | 0.091 | 0.795 |
| 0.49         | 0.0027 | 0.0036 | 0.046          | 0.041 | 0.005 | 0.143          | 0.018 | 0.007 | 0.209       | 0.044 | 0.002 | 0.111       | 0.052 | 0.000 |
| 0.007        | 0.22   | 0.036  | 0.029          | 19.6  | 0.007 | 0.006          | 0.108 | 0.041 | 0.134       | 0.159 | 0.009 | 0.268       | 0.200 | 0.013 |
| 0.029        | 0.075  | 0.029  | 0.006          | 0.07  | 0.096 | 0.007          | 0.067 | 0.009 | 0.016       | 0.892 | 0.076 | 1.935       | 0.264 | 0.130 |
| 0.21         | 0.0017 | 0.19   | 1.05           | 0.098 | 0.012 | 0.331          | 0.010 | 0.021 | 0.059       | 0.015 | 0.012 | 1.121       | 0.011 | 0.031 |
| 3.15         | 0.13   | 0.014  | 0.064          | 0.055 | 0.111 | 0.007          | 0.011 | 0.034 | 0.015       | 0.026 | 0.018 | 0.021       | 0.024 | 0.835 |
| 0.41         | 0.096  | 0.0047 | 0.48           | 0.65  | 0.032 | 0.039          | 0.306 | 0.004 | 0.135       | 0.202 | 0.002 | 0.243       | 0.258 | 0.069 |
| 7.2          | 1.88   | 0.037  | 0.03           | 0.011 | 0.020 | 0.006          | 0.009 | 0.007 | 0.013       | 0.005 | 0.008 | 1.524       | 0.630 | 0.016 |
| 0.0033       | 0.12   | 0.068  | 0.11           | 0.016 | 0.153 | 0.005          | 0.019 | 0.005 | 0.011       | 0.011 | 0.063 | 0.242       | 0.169 | 0.089 |
| 0.051        | 0.12   | 0.13   | 6.27           | 0.13  | 1.99  | 0.006          | 0.010 | 0.009 | 0.003       | 0.110 | 0.007 | 0.030       | 0.627 | 0.187 |
| 0.024        | 0.022  | 1.44   | 0.012          | 0.017 | 0.013 | 0.008          | 0.003 | 0.021 | 0.003       | 0.004 | 0.028 | 0.009       | 0.635 | 1.698 |

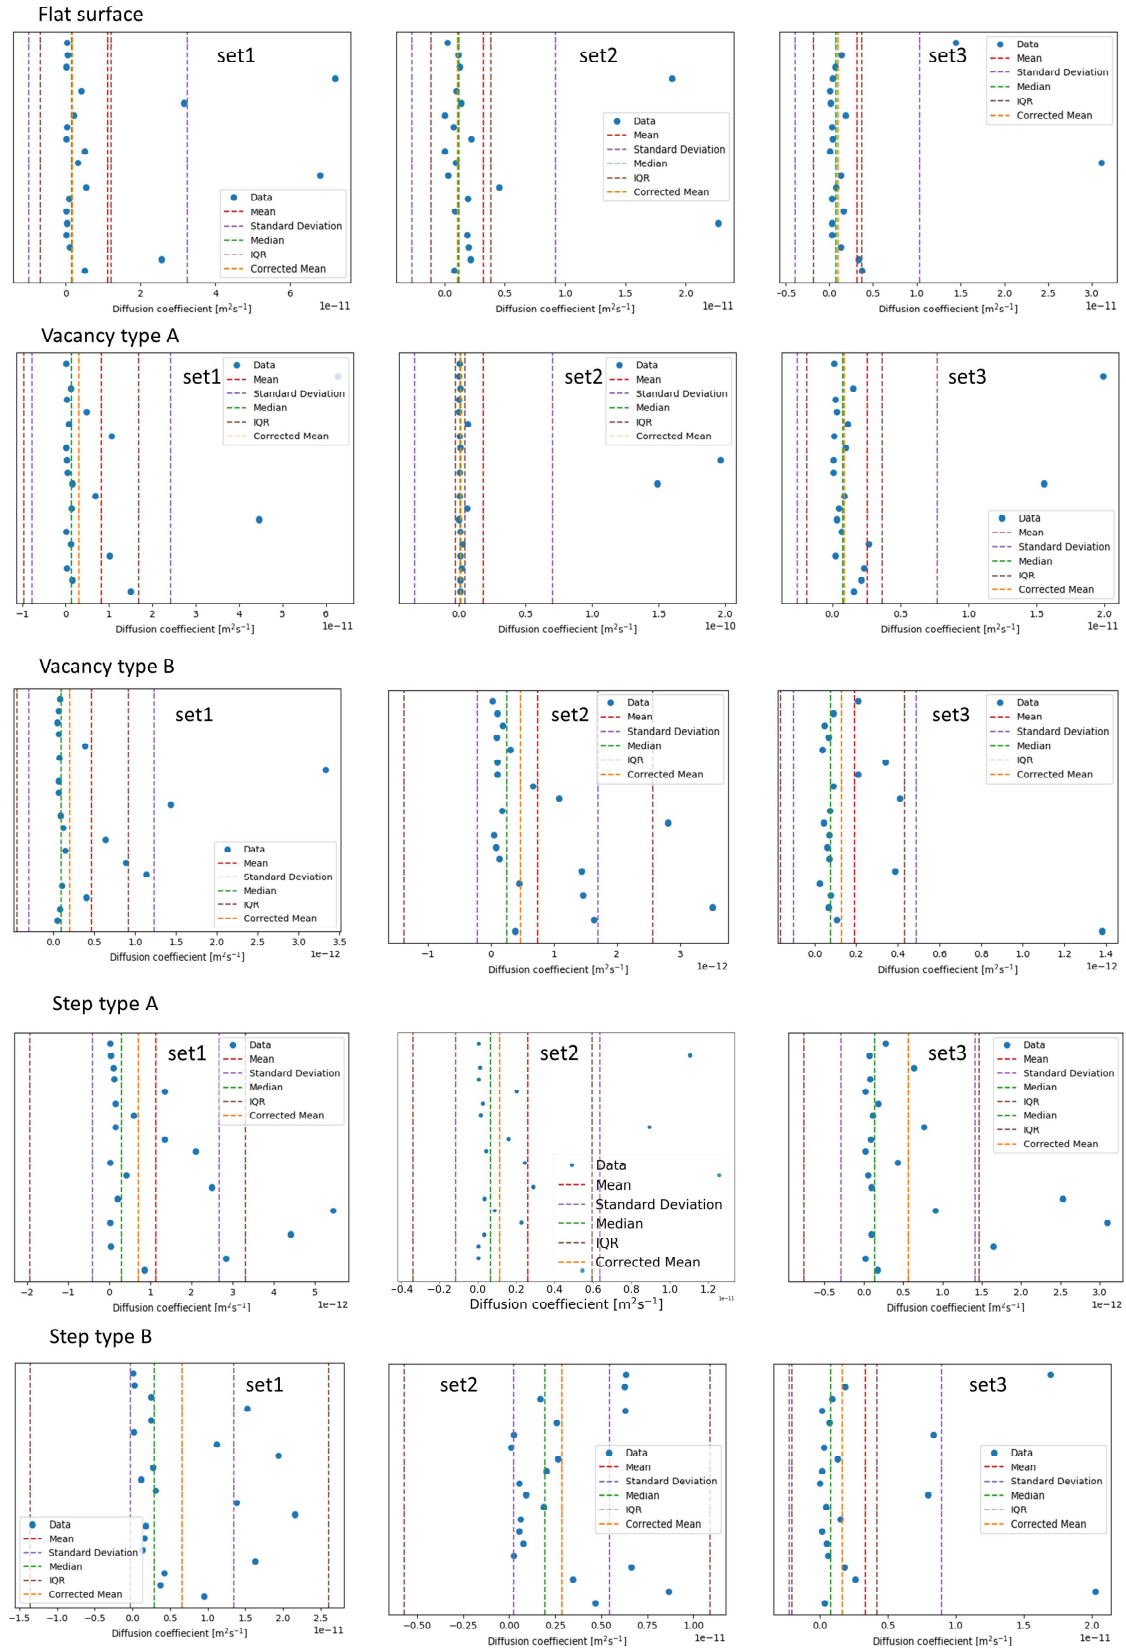

**Fig. 14** Figures of IQR analysis for all surface topologies and each simulation set - data points (blue scatter), mean (red), standard deviation (purple), median (green), corrected mean (orange), IQR (brown).

## Vacancy Type B

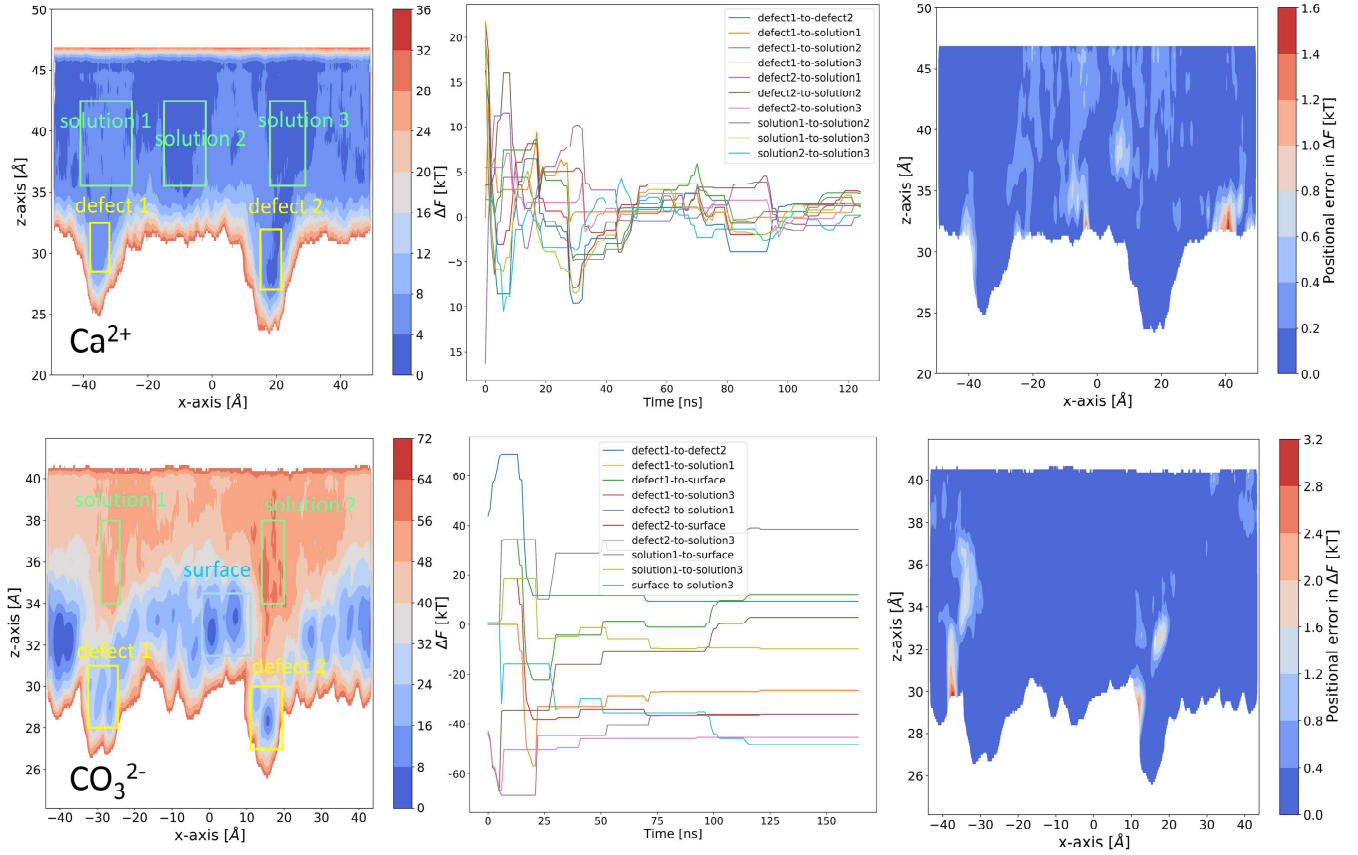

**Fig. 15** From left to right: Free energy profile recovered from PLUMED; Convergence analysis in time based on the highlighted sections in the free energy profiles; Positional standard error in the free energy over the last 20ns of simulation time.

### 5.4 WTmetaD Convergence Analysis

This section discusses the convergence analysis for the free energy profiles of a  $\text{Ca}^{2+}$  and  $\text{CO}_3^{2-}$  ion at a SAM surface which has topological defects of the type *vacancy type B*. Fig.15 reports each free energy profile in units of  $k_B T$ , where areas of interest have been highlighted and labelled. We record the difference between the minimum free energy values in the highlighted regions, shown in the middle plots. Plotting this metric in time allows us to gauge how much the free energy profile changes in those regions. In both cases we show that towards the last 10-20ns of the simulation fluctuations are as low as  $1.5k_B T$  for the  $\text{Ca}^{2+}$  ion and  $0k_B T$  for the cation, which gives us confidence that the CV space has been sampled sufficiently and the reported free energy profiles are reliable. Additionally, we report the positional standard error for each free energy profile for the last 20ns of the simulation. This calculation also shows that the CV space has been thoroughly explored as positional error is on average less than  $1k_B T$  unit.

As a point of comparison, we also report the free energy profile for each ion at a flat, defect-free surface in Fig.16.



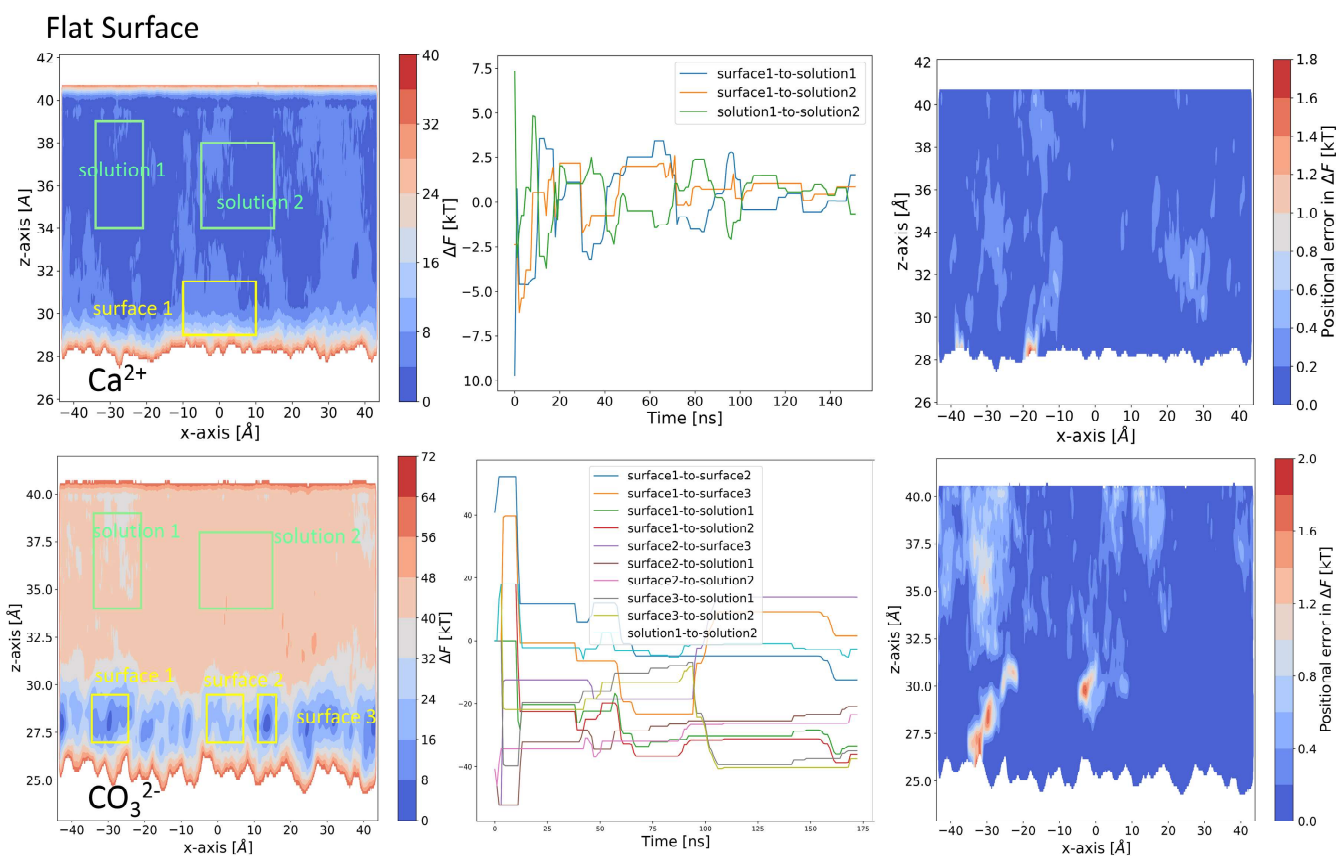

**Fig. 16** From left to right: Free energy profile recovered from PLUMED; Convergence analysis in time based on the highlighted sections in the free energy profiles; Positional standard error in the free energy over the last 20ns of simulation time.

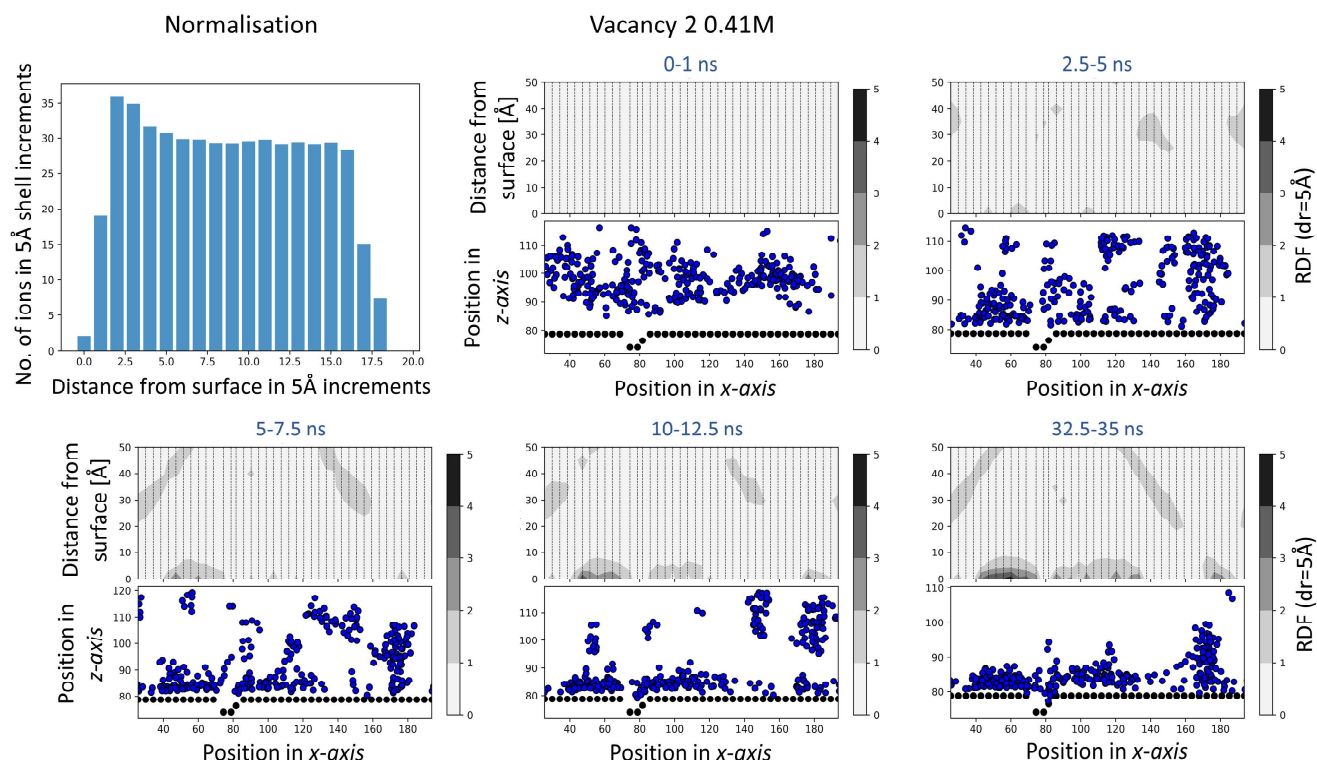

**Fig. 17** Normalisation factor used for RDF analysis; Incremental time progression of the RDF calculated for the system with ionic concentration of 0.41M

### 5.5 Large-Scale Simulation RDF calculation

We calculate the Radial Distribution Function (RDF) between a unique -COOH functional group along the surface  $xz$ -plane cross-section and ions in solution.

Due to the specificity of the problem, we calculated a custom-made normalisation factor, reported in Fig.17. Ions onto a surface have a 2D distributional character which has to be accounted for when calculating their RDF profile. To do this, we generated 600 random configurations of 500 ions each using Packmol (corresponding to our higher concentration of ions) in a rectangular box of dimensions  $130\text{\AA} \times 60\text{\AA} \times [10, 12.5 \text{ and } 15]\text{\AA}$ . The dimensions were chosen to represent the typical surface coverage the typical thickness of the ionic layer in our simulations. To obtain a normalisation factor, we count the number of ions from the centre of the box in increments of  $5\text{\AA}$  in each configuration and average over the 600 configurations. The normalisation factor we used is reported in Fig.17.

In Fig.17 and Fig.18 we report the incremental time change in the RDF in the two sets of large-scale simulations we performed in order to demonstrate that in both cases we start from a random distribution of ions and the preferential clustering around the defects occurs naturally during the course of the simulation.

Vacancy 2 0.69M

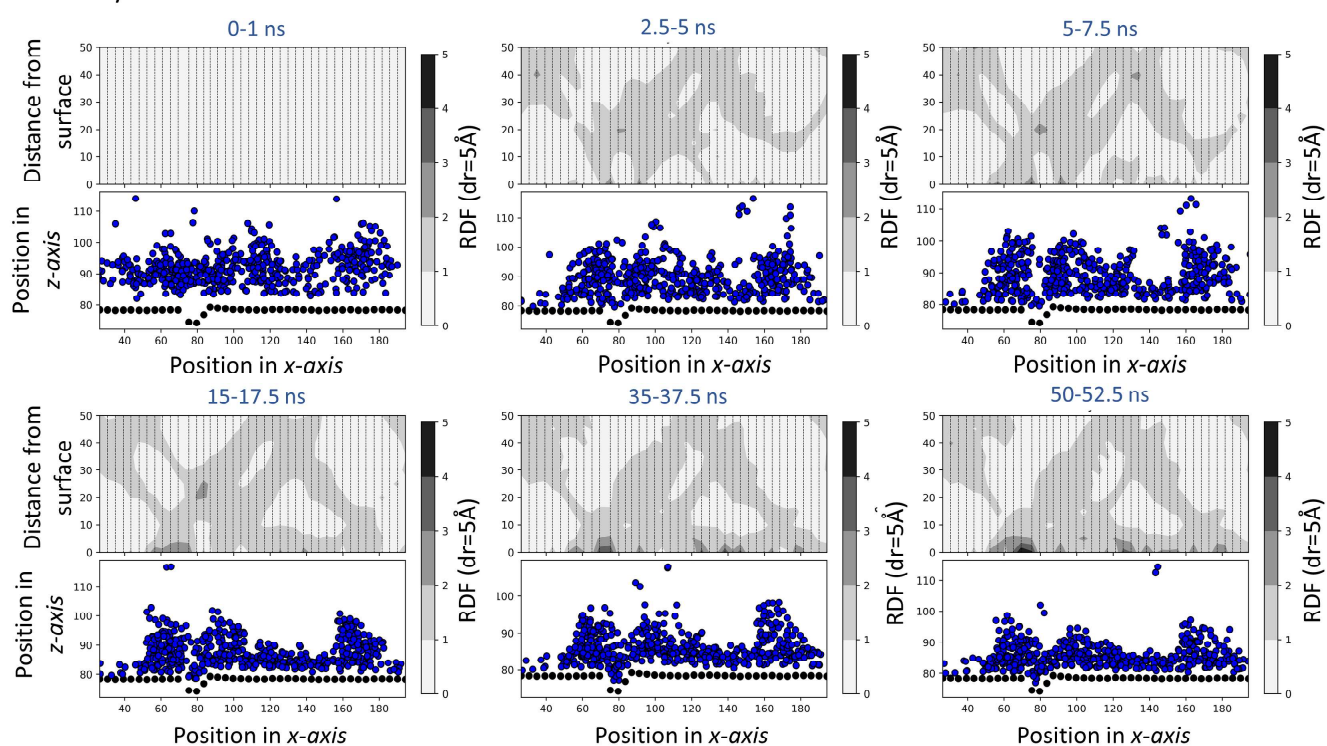

**Fig. 18** Incremental time progression of the RDF calculated for the system with ionic concentration of 0.69M
